# Supplementary material for: Organic field effect transistors based on self-assembling core-modified peptidic polymers
Source: Royal Society of Chemistry journal article supplement (doi:10.1039/c9me00170k), 2020-01-01
Supplement: c9me00170k1.pdf [file c9me00170k1.pdf]

## Supplementary Information

### Organic Field Effect Transistors Based on Self-Assembling Core-Modified Peptidic Polymers

Sameer Dhawan,<sup>a</sup> Akshay Moudgil,<sup>b</sup> Hanuman Singh,<sup>a</sup> Soniya Gahlawat,<sup>a</sup> Jisha Babu,<sup>a</sup> Pravin P Ingole,<sup>a</sup> Samaresh Das,<sup>\*b</sup> and V. Haridas<sup>\*a</sup>

<sup>a</sup>*Department of Chemistry, Indian Institute of Technology Delhi, Hauz Khas, New Delhi-110016, India.*

<sup>b</sup>*Centre for Applied Research in Electronics, Indian Institute of Technology Delhi, Hauz Khas, New Delhi-110016, India.*

\*Corresponding Authors:

V. Haridas, E-mail: haridasv@chemistry.iitd.ac.in

Samaresh Das, E-mail: samareshdas@care.iitd.ac.in

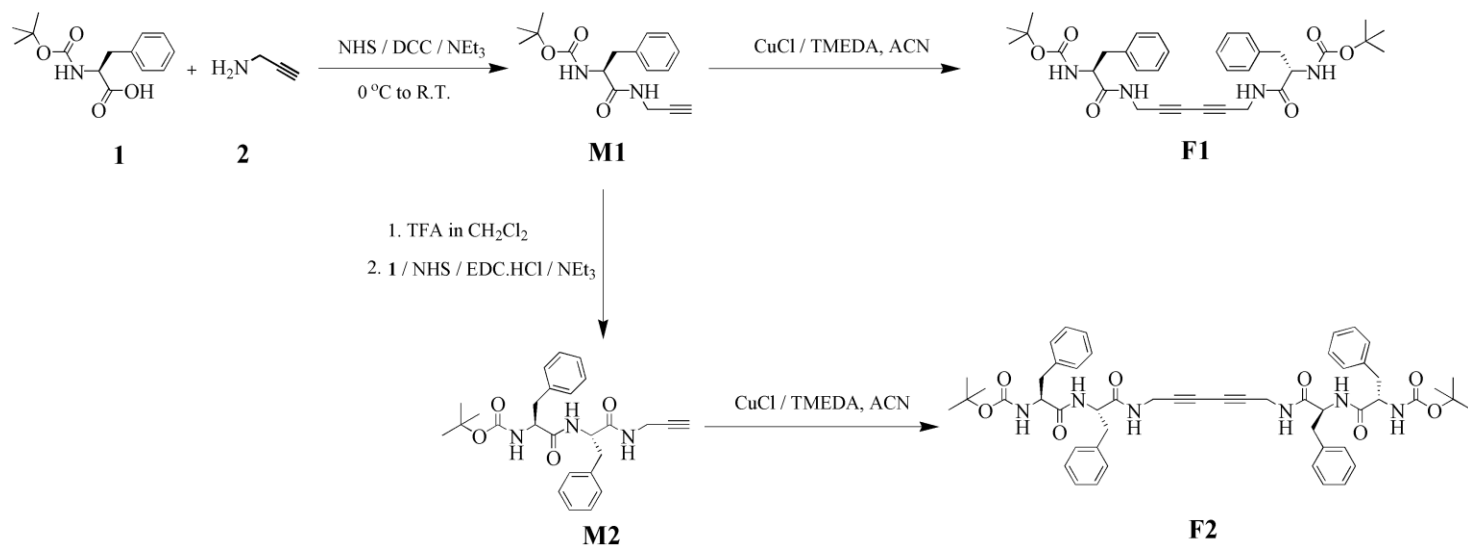

**Scheme S1:** Synthetic route of diacetylene monomers **F1** and **F2**.

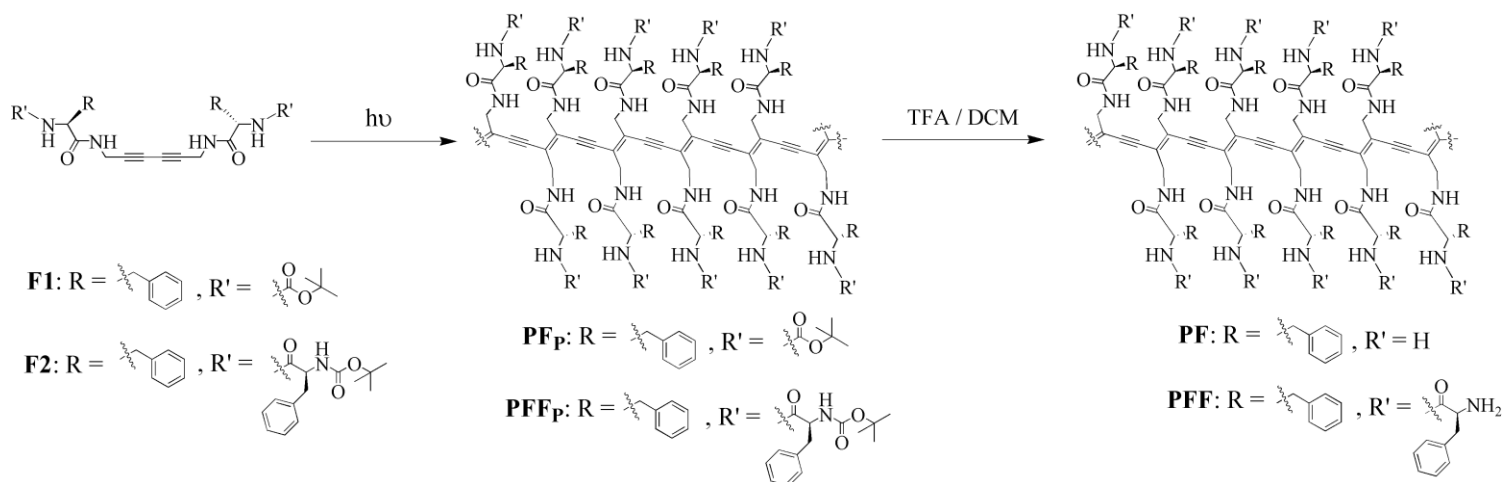

**Scheme S2:** Synthesis of Phe-appended polydiacetylenes **PF** and **PFF**.

**Table S1:** Details of the band structure parameters of polymers.

| <b>Polymer</b> | <b>HOMO<br/>vs.<br/>Vacuum</b> | <b>LUMO<br/>vs.<br/>Vacuum</b> | <b>Band Gap (From CV)<br/>(eV)</b> | <b>Band Gap (From UV)<br/>(eV)</b> |
|----------------|--------------------------------|--------------------------------|------------------------------------|------------------------------------|
| <b>PFF</b>     | -6.82                          | -4.50                          | 2.32                               | 2.24                               |
| <b>PF</b>      | -6.75                          | -4.31                          | 2.44                               | 2.28                               |

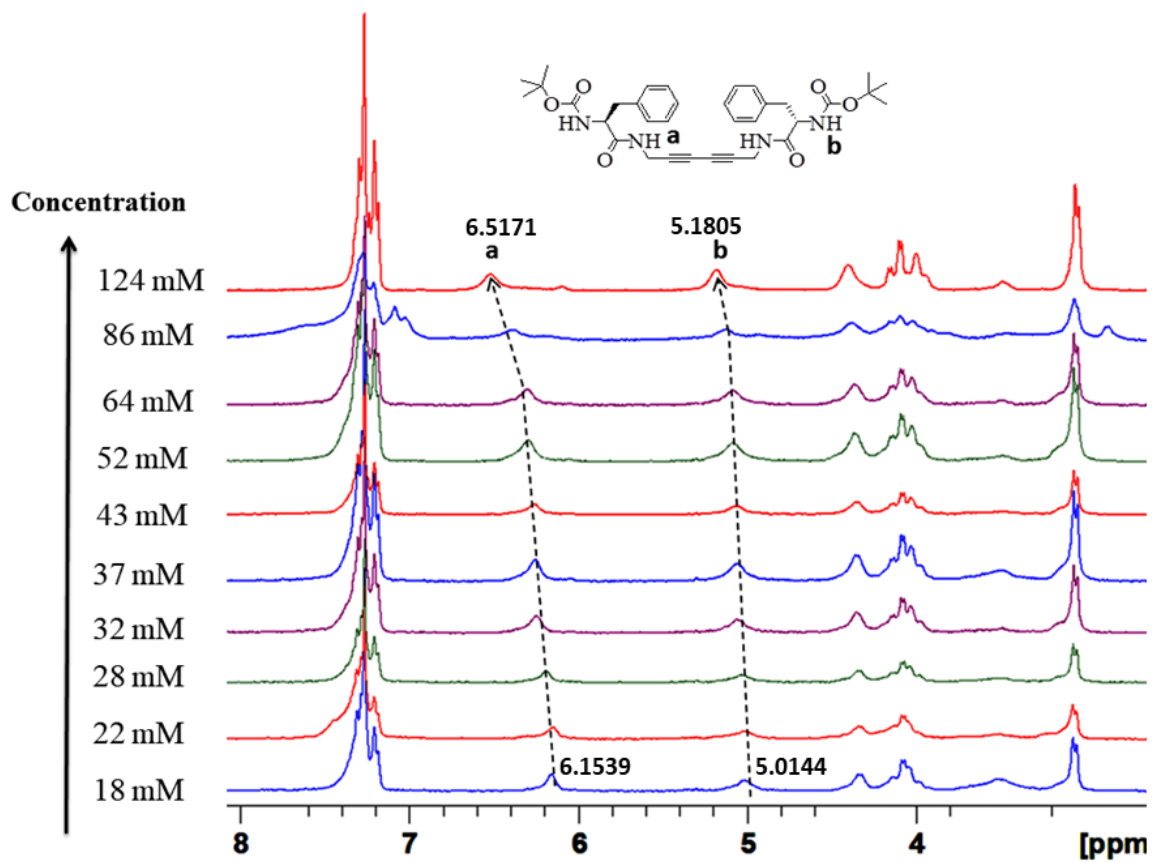

**Figure S1:** Concentration-dependent  $^1\text{H}$  NMR (300 MHz,  $\text{CDCl}_3$ ) of **F1**. (Concentration-dependent  $^1\text{H}$  NMR spectra of **F2** was not recorded due to its immediate polymerization)

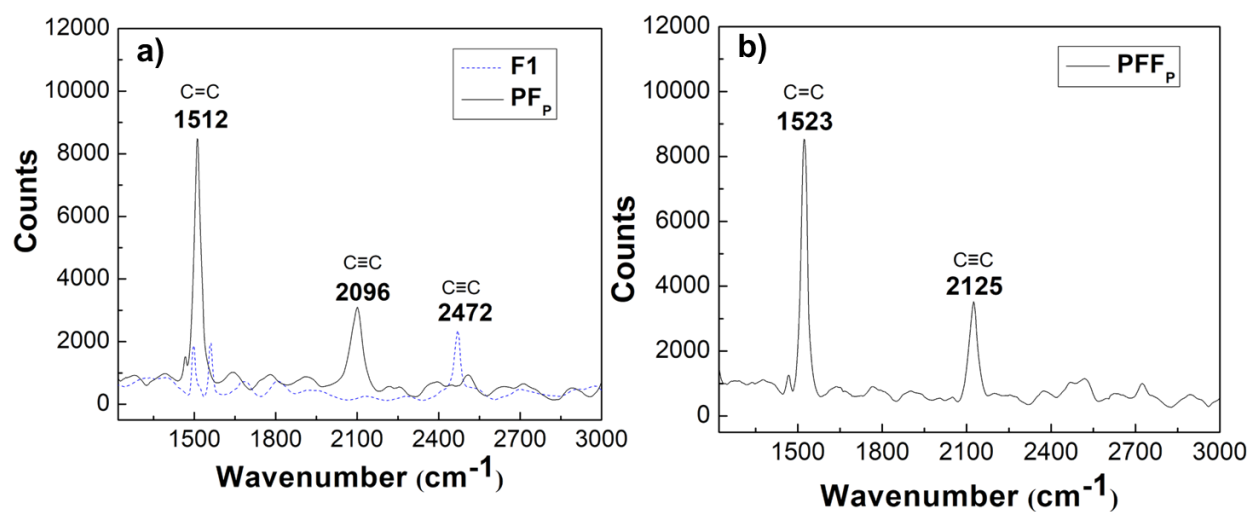

**Figure S2:** Normalized Raman spectra of diacetylenes and corresponding polydiacetylenes. Blue dotted line is diacetylene before UV exposure and black solid line is after the formation of polymers. (Raman spectrum of **F2** was not recorded due to its immediate polymerization)

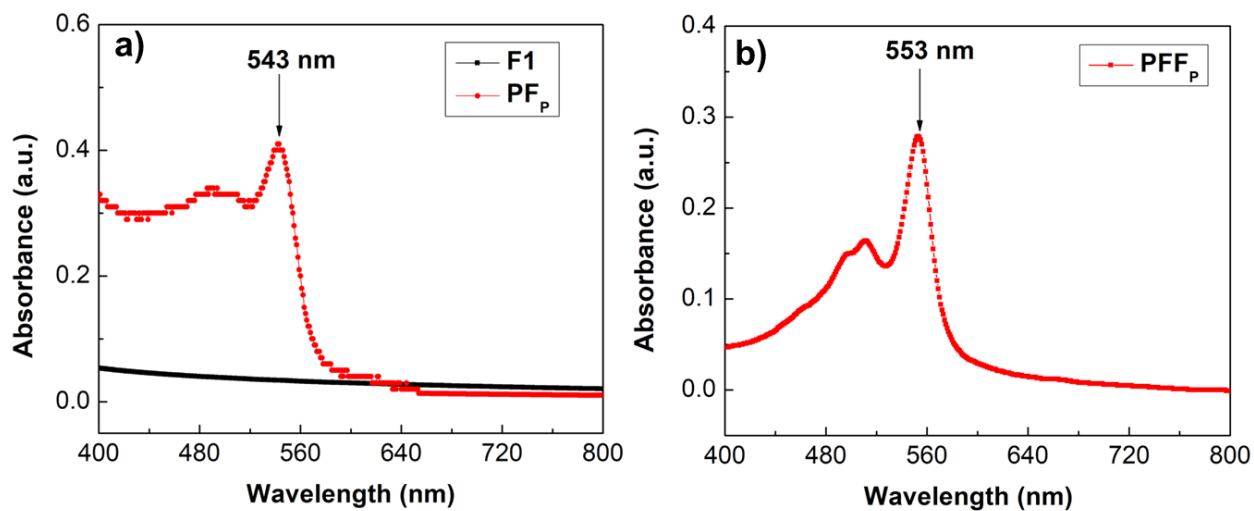

**Figure S3:** UV-Vis absorption spectra of diacetylene monomers and corresponding polymers. (UV-Vis absorption spectrum of **F2** was not recorded due to its immediate polymerization)

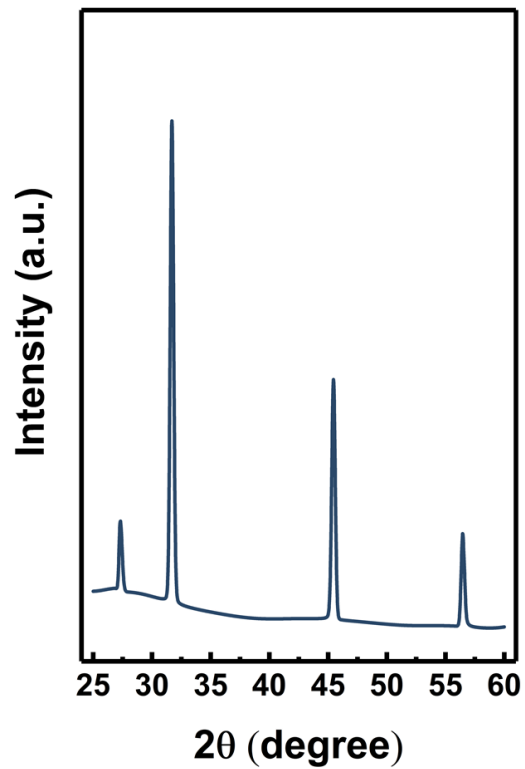

**Figure S4:** Powder X-ray diffraction pattern of polymer **PFF**. (PXRD data of **PF** was not recorded due to its sticky nature)

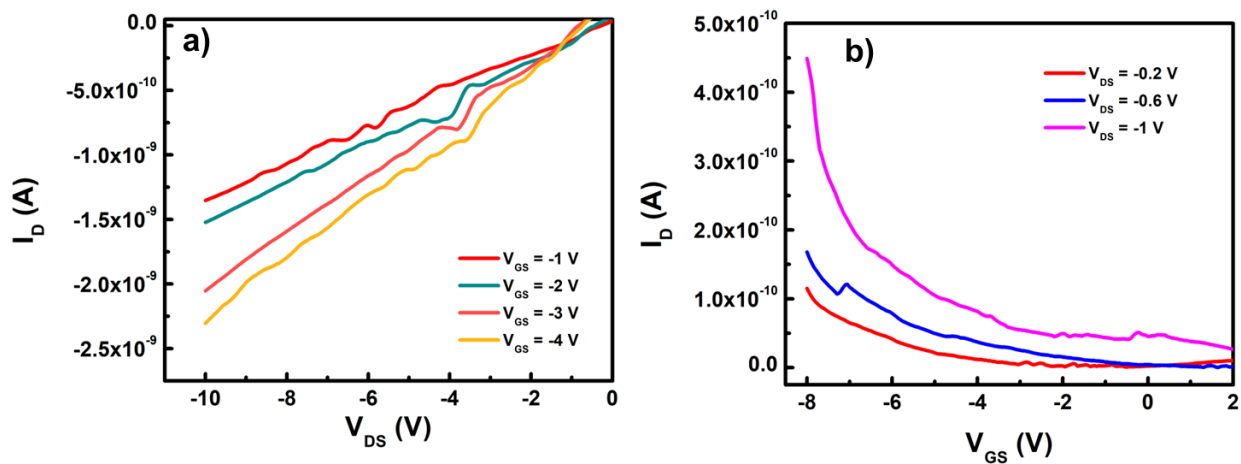

**Figure S5:** FET measurements on polymer **PF** (a) Output characteristics, (b) Transfer characteristics.

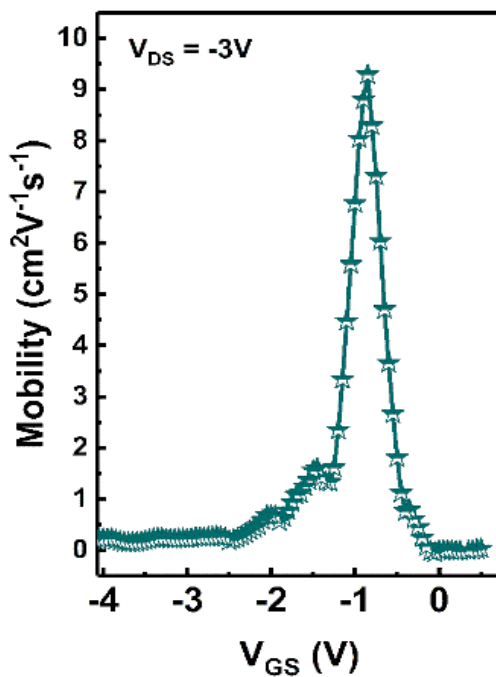

**Figure S6:** Variation of mobility with  $V_{GS}$  at room temperature under ambient conditions in the case of **PFF**.

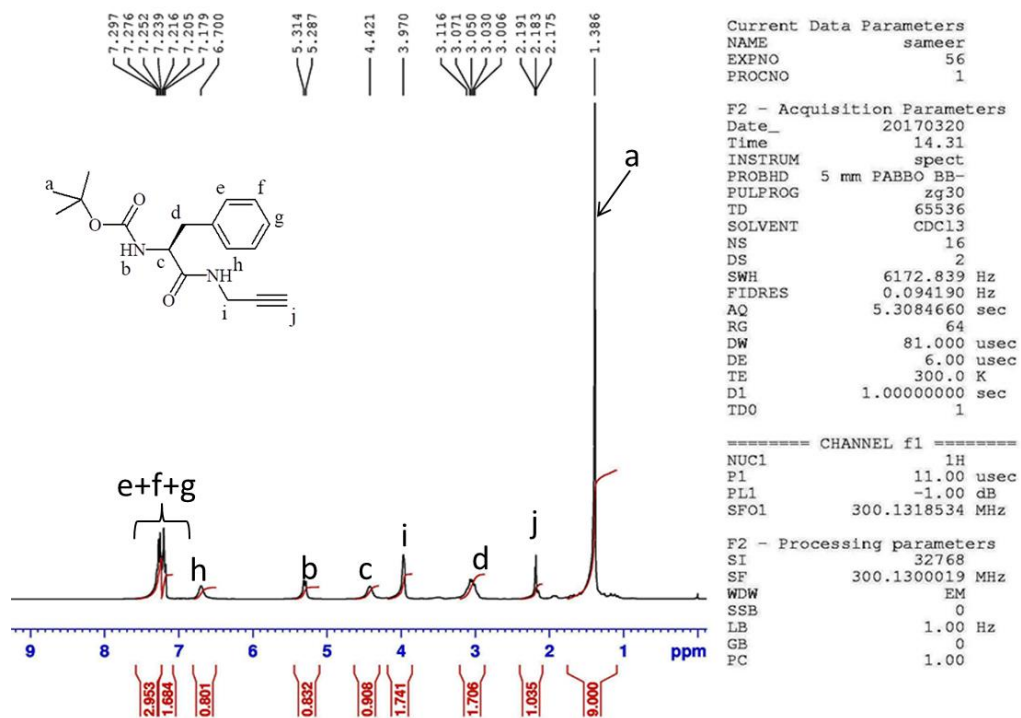

Figure S7:  $^1\text{H}$  NMR (300 MHz,  $\text{CDCl}_3$ ) spectrum of M1.

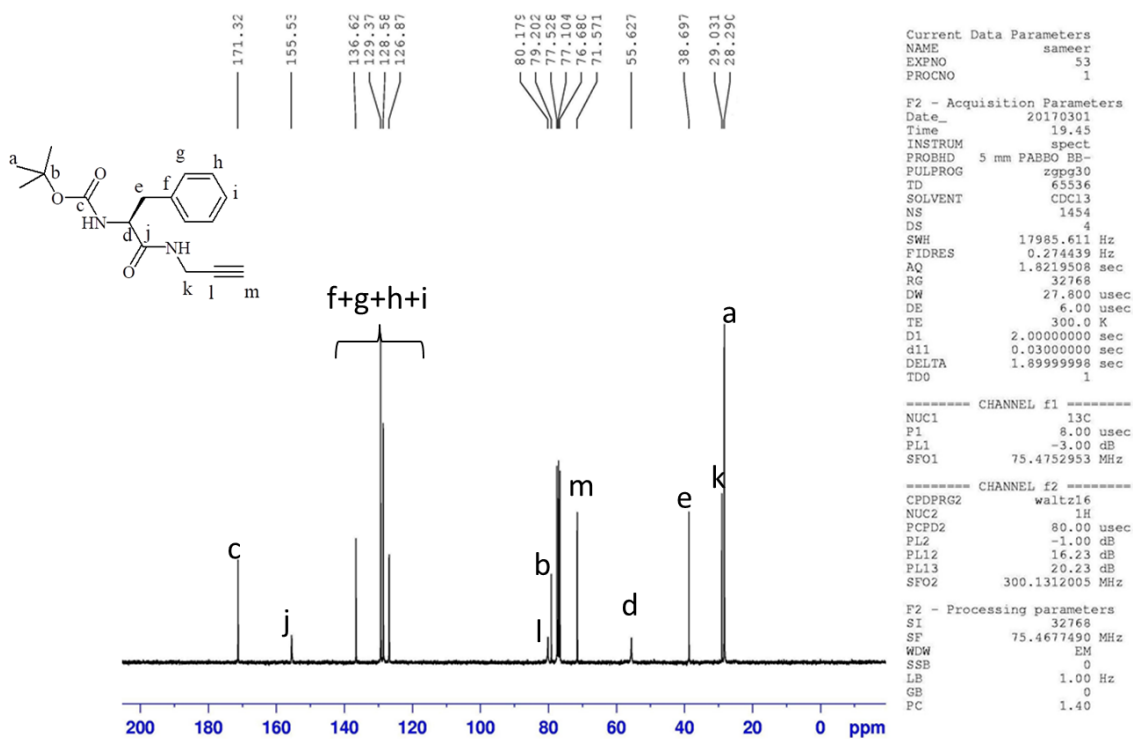

Figure S8:  $^{13}\text{C}$  NMR (75 MHz,  $\text{CDCl}_3$ ) spectrum of M1.





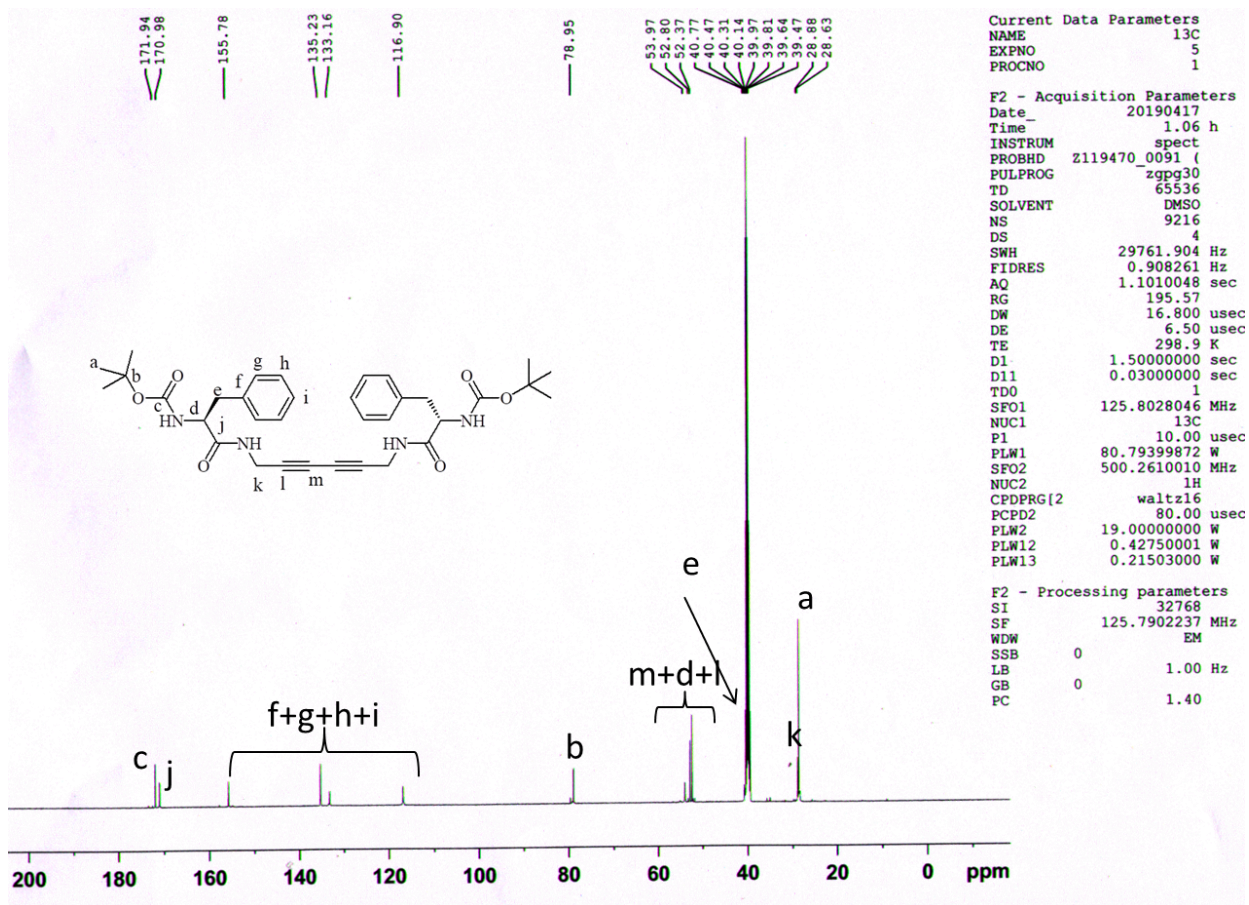

Figure S11:  $^{13}\text{C}$  NMR (125 MHz,  $\text{DMSO}-d_6$ ) spectrum of **F1**.

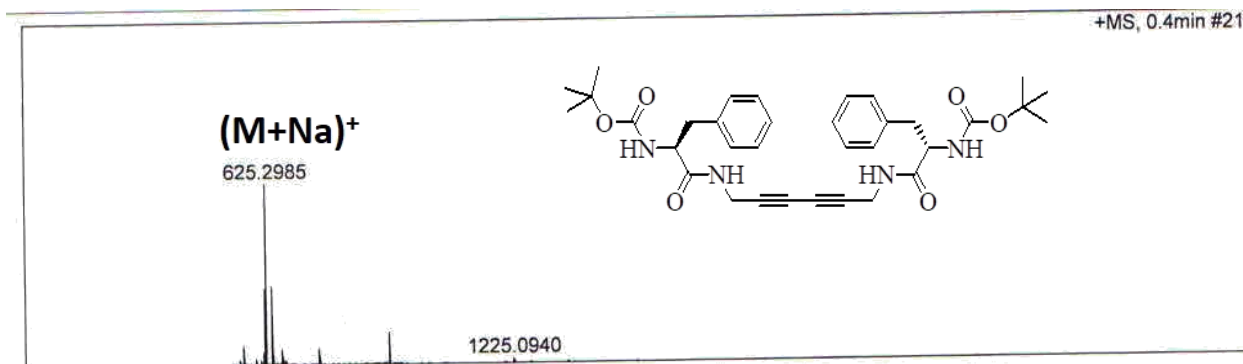

Figure S12: ESI-Mass Spectrum of **F1**.

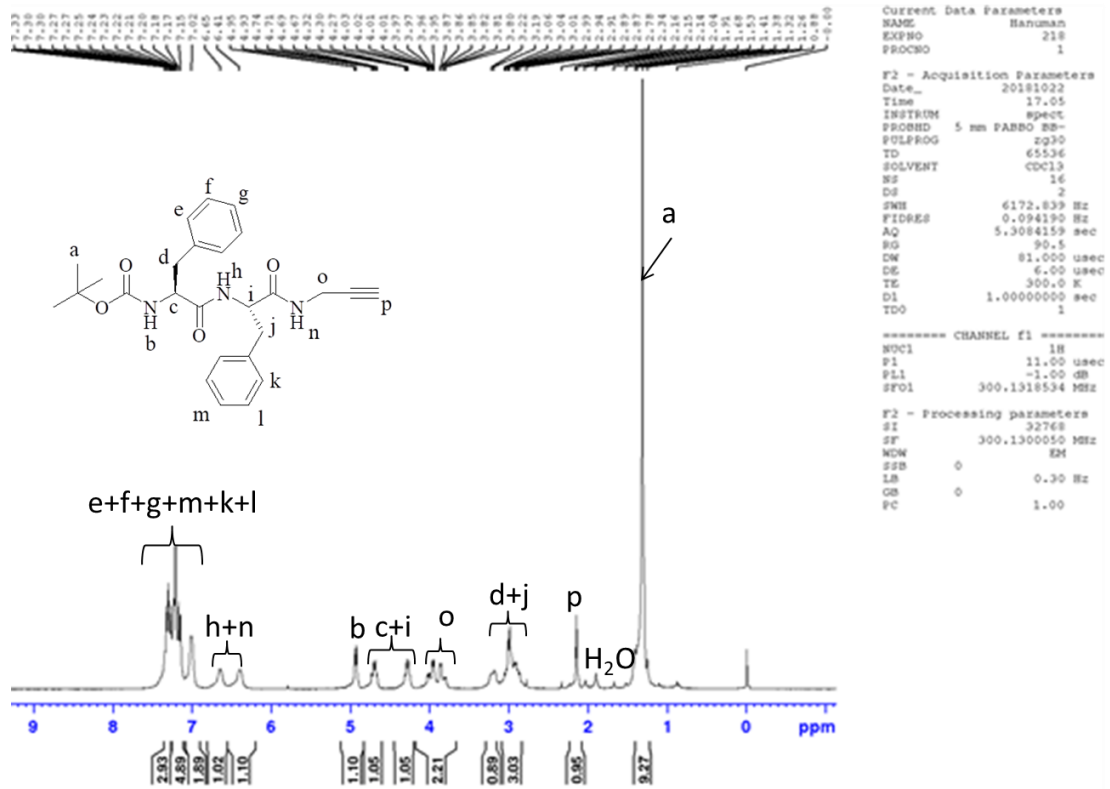

Figure S13:  $^1\text{H}$  NMR (300 MHz,  $\text{CDCl}_3$ ) spectrum of M2.

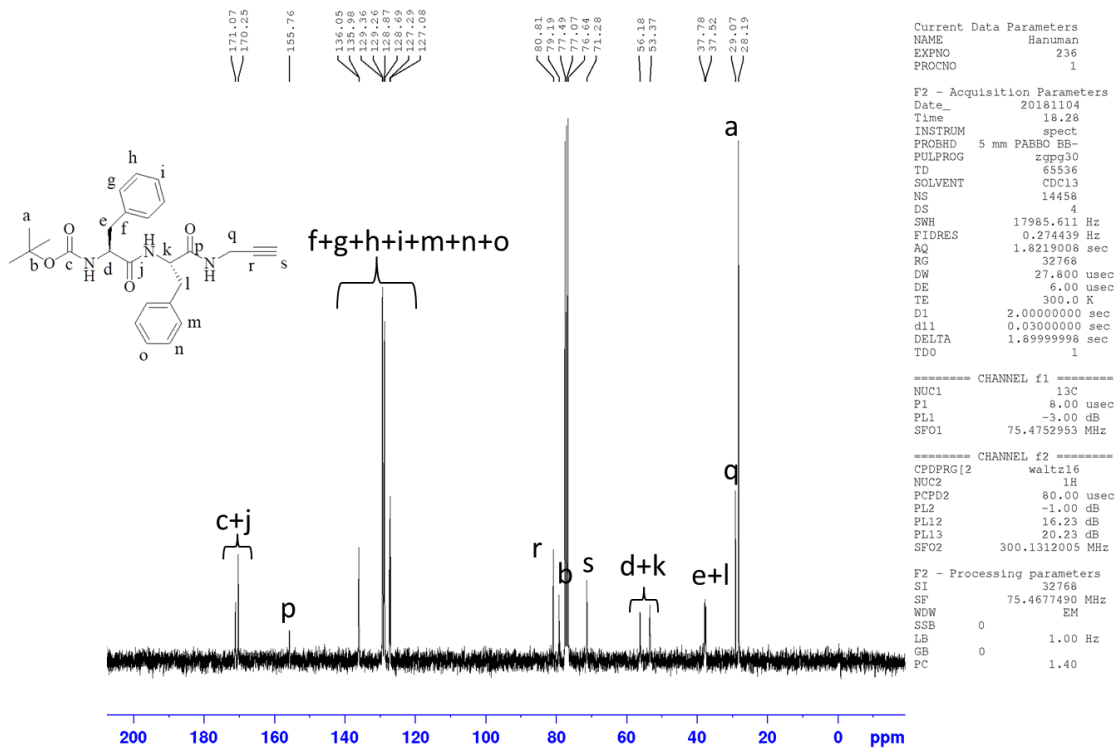

Figure S14:  $^{13}\text{C}$  NMR (75 MHz,  $\text{CDCl}_3$ ) spectrum of M2.

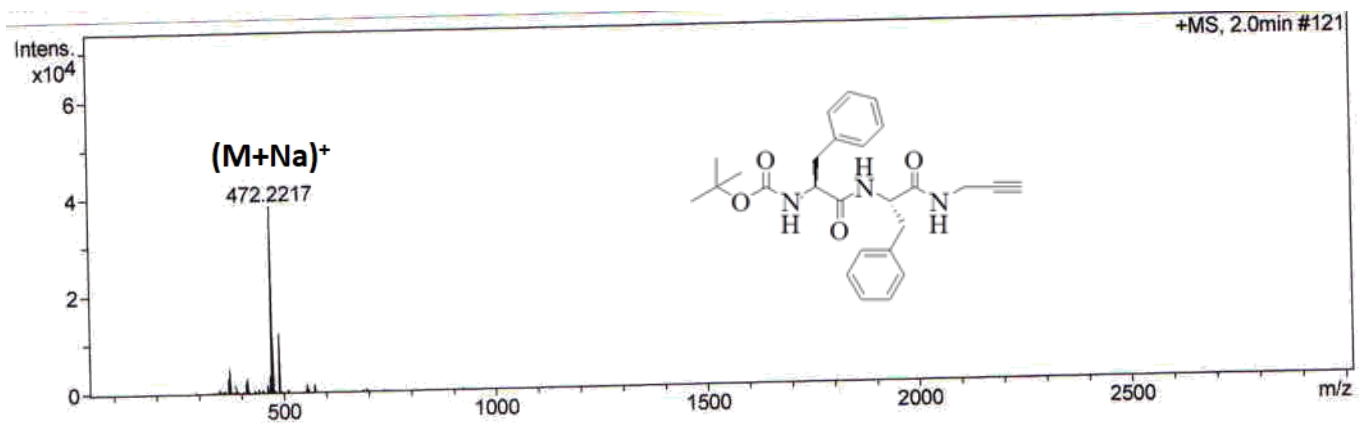

**Figure S15:** ESI-Mass Spectrum of **M2**.
